# Supplementary material
Source: Springer Nature journal article supplement (https://www.springermedizin.de/resource/supplementary/13058_2014_3396_MOESM2_ESM.pdf/9704088)

## RB loss:

RB loss, Diminished Cyclin D1, Superphysiological p16ink4a, deregulated E2F activity

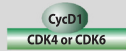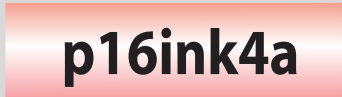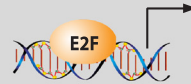

## Cyclin D1 overexpression/amplification:

High levels of Cyclin D1, physiological p16ink4a, hyperphosphorylated RB deregulated E2F activity

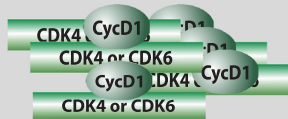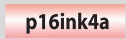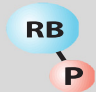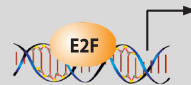

## P16ink4a loss:

Loss of p16ink4a physiological cyclin D1, hyperphosphorylated RB, deregulated E2F activity

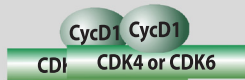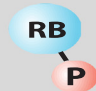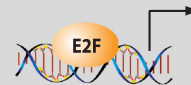

Supplement: MOESM2 [file 9704088]
